# Supplementary material for: Crystal structure of an L chain optimised 14F7 anti-ganglioside Fv suggests a unique tumour-specificity through an unusual H-chain CDR3 architecture
Source: PubMed Central journal article supplement (PMC6052152; doi:10.1038/s41598-018-28918-5), 2018-07-18
Supplement: 41598_2018_28918_MOESM1_ESM.pdf [file 41598_2018_28918_MOESM1_ESM.pdf]

*Supplementary Material*

**Crystal structure of an L chain optimised 14F7 anti-ganglioside Fv suggests a unique tumour-specificity through an unusual H-chain CDR3 architecture**

**Kaare Bjerregaard-Andersen<sup>1\*#</sup>, Hedda Johannesen<sup>1#</sup>, Noha Abdel-Rahman<sup>1,2</sup>, Julie Elisabeth Heggelund<sup>1§</sup>, Helene Mykland Hoås<sup>1</sup>, Fana Abraha<sup>3</sup>, Paula A. Bousquet<sup>1</sup>, Lene Støkken Høydahl<sup>4</sup>, Daniel Burschowsky<sup>1†</sup>, Gertrudis Rojas<sup>5</sup>, Stefan Oscarson<sup>3</sup>, Geir Åge Løset<sup>4,6,7\*</sup>, Ute Krengel<sup>1\*</sup>**

<sup>1</sup> Department of Chemistry, University of Oslo, NO-0315 Oslo, Norway

<sup>2</sup> Department of Biochemistry, Faculty of Pharmacy, Mansoura University, Mansoura 35516, Egypt

<sup>3</sup> School of Chemistry, University College Dublin, Belfield, Dublin 4, Ireland

<sup>4</sup> Centre for Immune Regulation and Department of Immunology, University of Oslo and Oslo University Hospital, N-0372 Oslo, Norway.

<sup>5</sup> Center of Molecular Immunology, Calle 216 esq 15, Atabey, Playa, La Habana CP 11300, Cuba

<sup>6</sup> Department of Biosciences, University of Oslo, NO-0316 Oslo, Norway

<sup>7</sup> Nextera AS, Oslo, Norway

Present addresses:

<sup>§</sup> School of Biomedical Sciences, University of Leeds, Leeds, LS2 9JT, UK

<sup>†</sup> Leicester Institute of Structural and Chemical Biology, University of Leicester, Leicester, LE1 7HB, UK

<sup>#</sup> Authors contributed equally

\*Correspondence: Kaare Bjerregaard-Andersen (kaarebj@kjemi.uio.no), Geir Åge Løset (g.a.loset@ibv.uio.no) and Ute Krengel (ute.krengel@kjemi.uio.no).

## **Supplementary Data**

### **Supplementary Data S1:**

**Translated protein sequences and calculated extinction coefficients for constructs C1-C4. Format: V<sub>H</sub> – linker - V<sub>L</sub>. Linker sequence is underlined.**

#### **C1:**

QVQLQQSGAELAKPGASMKMSCRASGYSFTSYWIHWLQRPDQGLEWIGYIDPATAY  
TESNQKFKDKAILTADRSSNTAFMYLNSLTSEDSAVYYCARESPRLRRGIYYYAMDYWGQ  
GTTVTVSSKLSGSASAPKLEEGEFSEARVDIQMTQTPSSLSASLGDRVTISCRASQDISN  
YLNWYQQKPDGTVKLLIYYTSRLHSGVPSRFSGSGSGTDYSLTISNLEQEDIATYFCQQG  
NTLPPTFGAGTKLELK

Ext. Coeff. (280 nm): 53080 M<sup>-1</sup> cm<sup>-1</sup>

Theoretical pI: 6.9

#### **C2:**

QVQLQQSGAELAKPGASMKMSCRASGYSFTSYWIHWLQRPDQGLEWIGYIDPATAY  
TESNQKFKDKAILTADRSSNTAFMYLNSLTSEDSAVYYCARESPRLRRGIYYYAMDYWGQ  
GTTVTVSSKLSGSASAPKLEEGEFSEARVDLVLQSPATLSVTPGDSVSFSCRASQSISN  
NLHWYQQRTHESPRLLIKYASQISGIPSRFSGSGSGTDFTLTISSVETEDFGMYFCQQS  
NRWPLTFGAGTKLELK

Ext. Coeff. (280 nm): 54110 M<sup>-1</sup> cm<sup>-1</sup>

Theoretical pI: 7.8

#### **C3:**

QVQLQQSGAELAKPGASMKMSCRASGYSFTSYWIHWLQRPDQGLEWIGYIDPATAY  
TESNQKFKDKAILTADRSSNTAFMYLNSLTSEDSAVYYCARESPRLRRGIYYYAMDYWGQ  
GTTVTVSSKLAPQAKSSGSGSESKVDARVDIQMTQTPSSLSASLGDRVTISCRASQDISN  
YLNWYQQKPDGTVKLLIYYTSRLHSGVPSRFSGSGSGTDYSLTISNLEQEDIATYFCQQG  
NTLPPTFGAGTKLELK

Ext. Coeff. (280 nm): 53080 M<sup>-1</sup> cm<sup>-1</sup>

Theoretical pI: 8.6

#### **C4:**

QVQLQQSGAELAKPGASMKMSCRASGYSFTSYWIHWLQRPDQGLEWIGYIDPATAY  
TESNQKFKDKAILTADRSSNTAFMYLNSLTSEDSAVYYCARESPRLRRGIYYYAMDYWGQ  
GTTVTVSSKLAPQAKSSGSGSESKVDARVDLVLQSPATLSVTPGDSVSFSCRASQSISN  
NLHWYQQRTHESPRLLIKYASQISGIPSRFSGSGSGTDFTLTISSVETEDFGMYFCQQS  
NRWPLTFGAGTKLELK

Ext. Coeff. (280 nm): 54110 M<sup>-1</sup> cm<sup>-1</sup>

Theoretical pI: 8.8

Supplementary Data S2:

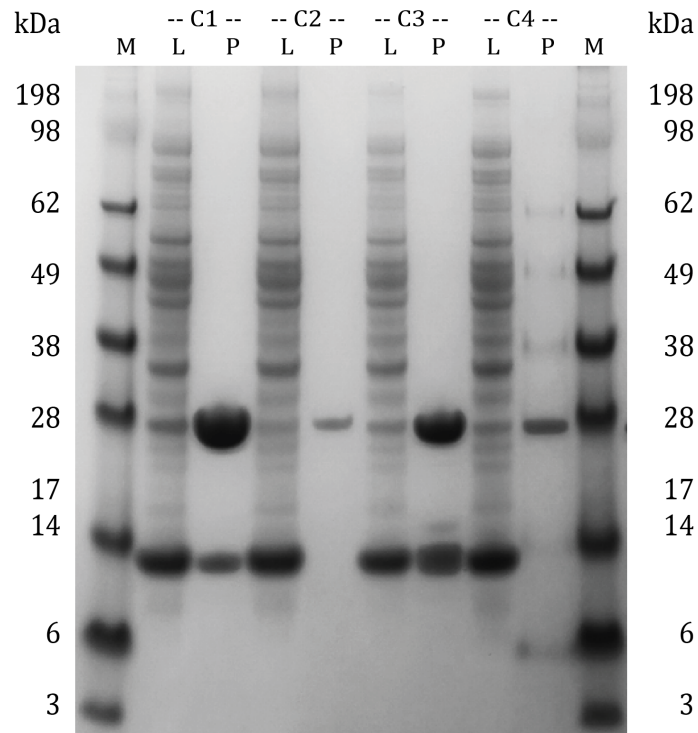

**Purification of scFv C1-4 from whole cell lysate.** Lanes with lysate (L) and purified scFv (P) are labelled. Marker (M) is shown for reference.

### Supplementary Data S3:

**A**

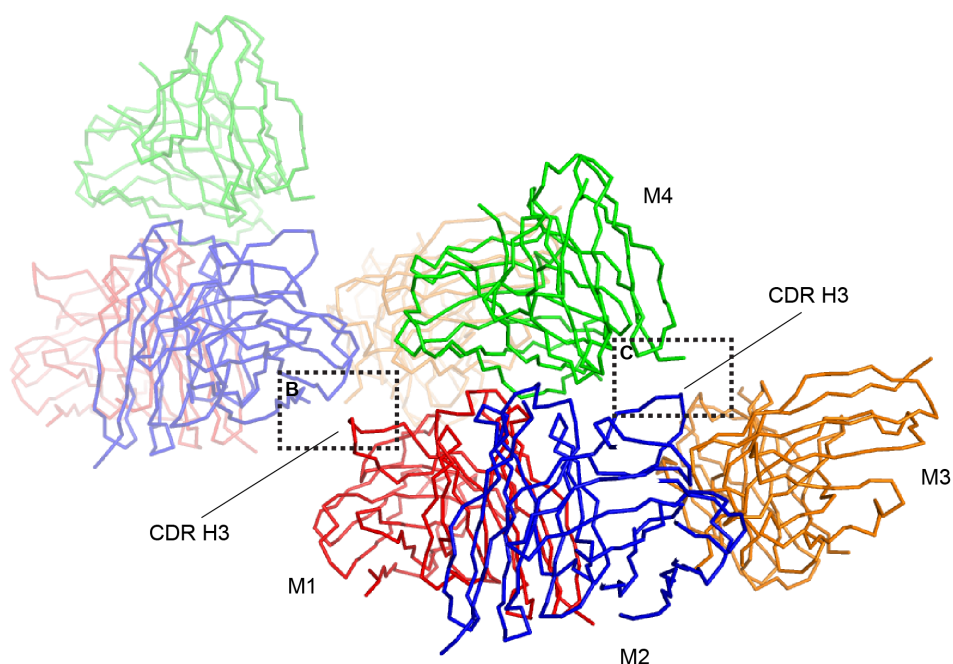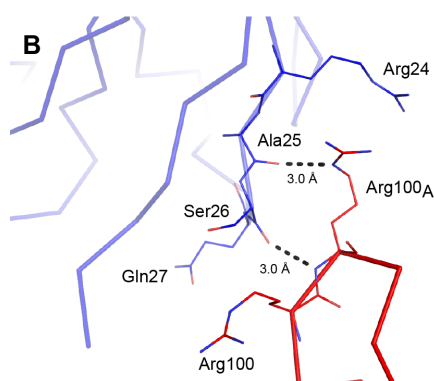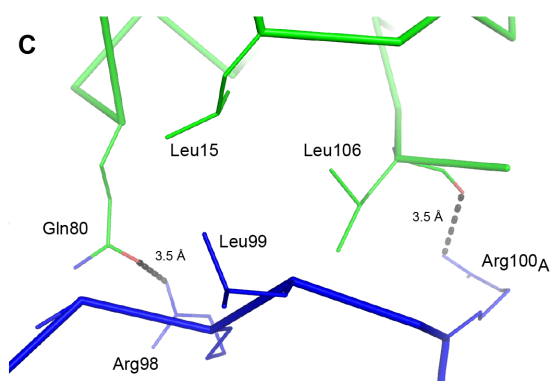

**Crystal contacts of the CDR H3 loops. (A)** Molecules M1 (red), M2 (blue), M3 (orange) and M4 (green) are depicted and symmetry-related molecules are displayed as transparent  $\text{C}\alpha$  traces with same colour coding. **(B)** The CDR H3 loop of M1 primarily interacts with M2. Arg100<sub>A</sub> interacts by hydrogen bonding with its side chain and main chain to Ala25 and Ser26 backbone carbonyls. Furthermore, there may be stacking interactions with Arg24. **(C)** The CDR H3 loop of M2 primarily interacts with M4. A motif of three leucine residues – Leu15, Leu99 and Leu106 – is central to the interaction. CDR H3 residues Arg98 and Arg100<sub>A</sub> are moreover close to residue Gln80 and the backbone carbonyl of Leu106, respectively, however, the distances (3.5 Å) are too long for efficient hydrogen bonding.



Supplementary Data S5:

NMR chemical shifts and mass spectrometry data for products in the synthesis of NeuGc trisaccharide

**Methyl (4,7,8,9-tetra-*O*-acetyl-5-benzyloxyacetamido-3,5-di-deoxy- $\alpha$ -D-glycero-D-galacto-2-nonulopyranosyl)onate-(2 $\rightarrow$ 3)-2,6-di-*O*-benzyl- $\beta$ -D-galactopyranosyl-(1 $\rightarrow$ 4)-1,2,3,6-tetra-*O*-benzyl- $\beta$ -D-glucopyranoside (4)**

**<sup>1</sup>H NMR** (500 MHz, CDCl<sub>3</sub>).  $\delta$  7.40-7.20 (m, 35H, H-Ar), 6.30 (d,  $J$  = 10.3 Hz, 1H, NH), 5.44-5.41 (m, 1H, H-8III), 5.32-5.29 (m, 1H, H-7III), 4.99-4.84 (m, 4H, 3 x CH<sub>2a</sub>-Bn, H-4II), 4.79-4.65 (m, 5H, 3 x CH<sub>2b</sub>-Bn, CH<sub>2</sub>-Bn), 4.63-4.33 (m, 8H, 3 x CH<sub>2</sub>-Bn, H-1II, H-1I), 4.25 (dd,  $J$  = 12.6, 2.7 Hz, 1H, H-9aIII), 4.13 (q,  $J$  = 10.4 Hz, 1H, H-5III), 4.10-4.02 (m, 2H, H-3II, H-6III), 4.00-3.95 (m, 2H, H-4I, H-9bIII), 3.92-3.81 (m, 3H, CH<sub>2</sub>CO, H-4II), 3.77 (s, 3H, OCH<sub>3</sub>), 3.75-3.71 (m, 2H, H-6aI), 3.72-3.66 (m, 1H, H-6aII), 3.59-3.52 (m, 2H, H-3I, H-2II), 3.52-3.45 (m, 3H, H-6bII, H-5II, H-2I), 3.37-3.33 (m, 1H, H-5I), 2.66 (d, 1H, OH), 2.55 (dd,  $J$  = 13.0, 4.6 Hz, 1H, H-3eqIII), 2.09 (s, 3H, COCH<sub>3</sub>), 2.03 (t,  $J$  = 12.8 Hz, 1H, H-3axIII), 1.98 (s, 3H, COCH<sub>3</sub>), 1.96 (s, 3H, COCH<sub>3</sub>), 1.88 (s, 3H, COCH<sub>3</sub>); **<sup>13</sup>C NMR** (125 MHz, CDCl<sub>3</sub>)  $\delta$  170.7, 170.4, 170.1, 170.0 (4 x COCH<sub>3</sub>), 168.5 (CO<sub>2</sub>CH<sub>3</sub>), 139.3, 139.1, 138.8, 138.7, 138.6, 137.8, 136.9, 129.2, 128.8, 128.5, 128.4, 128.4, 128.4, 128.3, 128.3, 128.3, 128.2, 128.2, 128.0, 127.8, 127.7, 127.7, 127.6, 127.6, 127.5, 127.3 (42 x C-Ar), 102.6 (C-1I), 102.5 (C-1II), 98.5 (C-2III), 83.2 (C-3I), 82.1 (C-2I), 78.6 (C-2II), 76.6, 76.6 (H-4I, H-3II), 75.5 (CH<sub>2</sub>-Bn), 75.3 (C-5I), 75.1, 75.1 (2 x CH<sub>2</sub>-Bn), 73.7, 73.5, 73.2 (3 x CH<sub>2</sub>-Bn), 72.7, 72.7 (C-6III, C-5II), 71.1 (CH<sub>2</sub>-Bn), 69.3 (CH<sub>2</sub>CO), 69.1 (C-4III), 68.7 (2C, C-6I, C-6II), 68.6 (C-8III), 68.1 (C-4II), 67.3 (C-7III), 62.4 (C-9III), 53.2 (OCH<sub>3</sub>), 48.5 (C-5III), 36.8 (C-3III), 21.3, 20.9, 20.8, 20.7 (4 x COCH<sub>3</sub>); **HRMS (ESI)**:  $m/z$  calcd for C<sub>81</sub>H<sub>91</sub>NO<sub>24</sub> [M+Na]<sup>+</sup>, 1484.5829; found, 1484.5842.

**3,5-Di-deoxy-5-glycoylamido- $\alpha$ -D-glycero-D-galacto-2-nonulopyranosylonic acid-(2 $\rightarrow$ 3)- $\beta$ -D-galactopyranosyl-(1 $\rightarrow$ 4)-D-glucopyranose (5).**

**$\beta$ -anomer <sup>1</sup>H NMR** (500 MHz, D<sub>2</sub>O)  $\delta$  4.72 (d,  $J$  = 8.0 Hz, 1H, H-1I), 4.59 (d,  $J$  = 7.9 Hz, 1H, H-1II), 4.22-4.18 (m, 3H), 4.04-3.63 (m, 17H), 3.35 (t,  $J$  = 8.5 Hz, 1H), 2.83 (dd,  $J$  = 12.7, 4.5 Hz, 1H, H-3eqIII), 1.93 (t,  $J$  = 12.4 Hz, 1H, H-3axIII); **<sup>13</sup>C NMR** (125 MHz, D<sub>2</sub>O)  $\delta$  175.8 (CONH), 172.7(COOH), 102.6 (C-1II), 99.2 (C-2III), 95.8 (C-1I), 78.3, 75.5, 75.1, 74.4, 73.8, 72.8, 71.4, 69.4, 68.1, 67.7, 67.6, 62.8, 61.0, 61.0, 60.1, 51.4, 39.3 (H-3III);

**$\alpha$ -anomer <sup>1</sup>H NMR** 500 MHz, D<sub>2</sub>O)  $\delta$  5.28 (d,  $J$  = 3.7 Hz, 1H, H-1I), 4.59 (d,  $J$  = 7.9 Hz, 1H, H-1II), 2.83 (dd,  $J$  = 12.7, 4.5 Hz, 1H, H-3eqIII), 1.93 (t,  $J$  = 12.4 Hz, 1H, H-3axIII); **<sup>13</sup>C NMR** (125 MHz, D<sub>2</sub>O)  $\delta$  102.6 (C-1II), 99.2 (C-2III), 91.8 (C-1I), 39.3 (C-3III); **HRMS (ESI)**:  $m/z$  calculated for C<sub>23</sub>H<sub>38</sub>NO<sub>20</sub> [M-H]<sup>-</sup>, 648.1987; found, 648.2014.
